# Supplementary material
Source: PubMed Central journal article supplement (PMC3361417)
Supplement: 1115906109_pnas.201115906SI.pdf [file 1115906109_pnas.201115906SI.pdf]

# Supporting Information

Jochum et al. 10.1073/pnas.1115906109

## SI Materials and Methods

**Construction of EBV and BNLF2a Deficient Recombinant EBV.** The EBV-encoded RNA (EBER)-1- and EBER-2-deficient recombinant EBV mutants  $\Delta$ EBER and  $\Delta$ EBER-TR<sup>-2/293</sup> were constructed by the targeted mutation of plasmid p2089 [encoding the B95.8 genome and giving rise to reproductive virus (1)], and p2114/TR<sup>-</sup> [encoding the B95.8 genome with deleted terminal repeats and giving rise to EBV-like particles (2)], respectively. In both plasmids, the EBER genes were replaced by a prokaryotic expression cassette for the galK gene as described (3). The  $\Delta$ BNLF2a mutant was generated by replacing the first codon (Met-1) of *BNLF2a* in p2089 by a stop codon.

In brief, a PCR fragment was generated that comprised the galK cassette and flanking arms homologous to the site of insertion. The product was inserted into the p2089 or p2114/TR-BAC, respectively, and SW105 clones were selected for competence in galactose metabolism. The EBER-mutant genomes were left with the introduced prokaryotic galK cassette serving as genomic spacer and termed  $\Delta$ EBER/p4661 (derived from p2089) and TR- $\Delta$ EBER/p4662 (derived from p2114/TR-).

For traceless mutation of BNLF2a, we applied a two-step cloning procedure, first replacing the Met-1 codon by a prokaryotic galK cassette, as described above. For replacement of the GalK cassette in the second step, a DNA fragment was synthesized that comprised the mutated nucleotides (stop codon and analytic SpeI site) and 50 bp of sequences homologous to the neighboring regions of the previously inserted galK cassette. This fragment was introduced into a SW105 clone from the precedent round of mutation and bacteria were then counterselected for galactose metabolism by feeding deoxygalactose (Sigma). This mutant was termed  $\Delta$ BNLF2a/p3912.

The intended recombination and overall integrity of the BACs were verified by multiple restriction digests and sequencing. High-quality BAC DNA was transfected into 293 cells, stable producer clones were selected, and virus stocks were generated as described previously (1). Additional information and cloning primers are available upon request.

**Confirmation of Producer Genotypes by Southern Blot.** Genomic DNA of producer clones was prepared using the QIAamp DNA Blood MiniKit (Qiagen). Three micrograms of DNA was cut with BamHI and BglII restriction enzymes (NEB) and resolved on a 0.8% agarose gel. Southern blotting was performed as described before (1). In brief, DNA was depurinated in 0.75% HCl in H<sub>2</sub>O and denatured in 1.5 M NaCl/0.5 M NaOH and blotted to a nylon membrane (Millipore) by capillary transfer. The mem-

brane was washed in 2× SSC buffer and prehybridized in 10 mL Church buffer at 65 °C for 30 min. The oriP probe was amplified by PCR using primers (5'-3') GTCTTGGTCCCTGCCTGG and GGTTAGTAAAAGGGTCTAAGGAAC and p2089 as PCR template. Fifty nanograms of PCR product were labeled with  $\gamma$ -P<sup>32</sup> CTP using HighPrimeMix (Roche), purified on a Sephadex-50 column (GE Healthcare), and eluted in 400  $\mu$ L Tris-EDTA buffer. The labeled probe was added to 25 mL Church buffer and incubated with the membrane at 65 °C overnight. Washing with 0.2× SSC/0.1 SDS decreased unspecific signals, and the membrane was exposed to Hyperfilm MP (GE Healthcare) at -80 °C.

**Preparation of RNA, Reverse Transcription, and Quantitative PCR.** Total RNA was prepared with the RNeasy MiniKit (Qiagen) and microRNA (miRNA) with the mirVana Kit (Ambion) according to the manufacturers' instructions. Total RNA from infected cells was extracted after thorough washing with PBS solution to eliminate free viruses. For the isolation of RNA from viral particles, supernatants were concentrated and pretreated with DNase and/or RNase (where indicated) and finally pelleted by ultracentrifugation at 100,000 × g at 4 °C for 1 h. RNA was eluted in RNase-free H<sub>2</sub>O and digested with 2 U DNase I (amplification grade; Invitrogen) with addition of 1  $\mu$ L RNasin (Promega) for 30 min at 37 °C. RNA (0.5–2  $\mu$ g) was used for reverse transcription with the SuperScriptIII Kit (Invitrogen) using random hexamer primers and miRNA-specific stem-loop primers, respectively. Details on stem-loop cDNA synthesis can be found elsewhere (4), Table S2 provides stem-loop-specific primers. Controls devoid of reverse transcriptase confirmed the absence of DNA in all samples, and controls devoid of RNA template excluded unspecific stem-loop cDNA synthesis. Quantitative PCR (qPCR) was performed in triplicates in a Light-Cycler 480 (Roche) by using SYBR Green Master I (Roche) and efficiency evaluated primers (Table S1). Standard qPCR was performed at 95 °C for 5 min, followed by 45 cycles of 60 °C for 10 s, 72 °C for 10 s, and 95 °C for 10 s. miRNA-specific signals were obtained in a touch-down qPCR with 95 °C for 5 min, followed by 5 cycles of 95 °C for 10 s and 70 °C for 1 min, 15 cycles of 95 °C for 10 s and an annealing temperature decreasing by 0.6 °C each cycle for 1 min, and a final 25 cycles with 95 °C for 10 s and 60 °C for 1 min. The product integrity was verified by a melting curve analysis. The calculation of crossing points was based on the second derivative maximum and relative transcript quantifications included PCR efficiencies. Values were calculated with LightCycler 480 Software 1.5 SP3 (Roche).

1. Delecluse HJ, Hilsendegen T, Pich D, Zeidler R, Hammerschmidt W (1998) Propagation and recovery of intact, infectious Epstein-Barr virus from prokaryotic to human cells. *Proc Natl Acad Sci USA* 95:8245–8250.

2. Delecluse HJ, Pich D, Hilsendegen T, Baum C, Hammerschmidt W (1999) A first-generation packaging cell line for Epstein-Barr virus-derived vectors. *Proc Natl Acad Sci USA* 96:5188–5193.

3. Warming S, Costantino N, Court DL, Jenkins NA, Copeland NG (2005) Simple and highly efficient BAC recombineering using galK selection. *Nucleic Acids Res* 33:e36.

4. Varkonyi-Gasic E, Wu R, Wood M, Walton EF, Hellens RP (2007) Protocol: A highly sensitive RT-PCR method for detection and quantification of microRNAs. *Plant Methods* 3:12.
